# Supplementary material for: Identification of Diterpenoid Alkaloids from the Rootsof Aconitum kusnezoffii Reihcb
Source: Molecules. 2011 Apr 19;16(4):3345–50. doi: 10.3390/molecules16043345 (PMC6260597; doi:10.3390/molecules16043345)

## Supporting information

-S1:  $^1\text{H}$ -NMR Spectrum of Compound 1 in  $\text{CDCl}_3$

-S2:  $^{13}\text{C}$ -NMR Spectrum of Compound 1 in  $\text{CDCl}_3$

- S3: DEPT Spectrum of Compound 1 in  $\text{CDCl}_3$

- S4:  $g^1\text{H}$ - $^1\text{H}$  COSY Spectrum of Compound 1 in  $\text{CDCl}_3$

- S5: gHSQC Spectrum of Compound 1 in  $\text{CDCl}_3$

- S6: gHMBC Spectrum of Compound 1 in  $\text{CDCl}_3$

**S1:**  $^1\text{H}$ -NMR Spectrum of Compound 1 in  $\text{CDCl}_3$

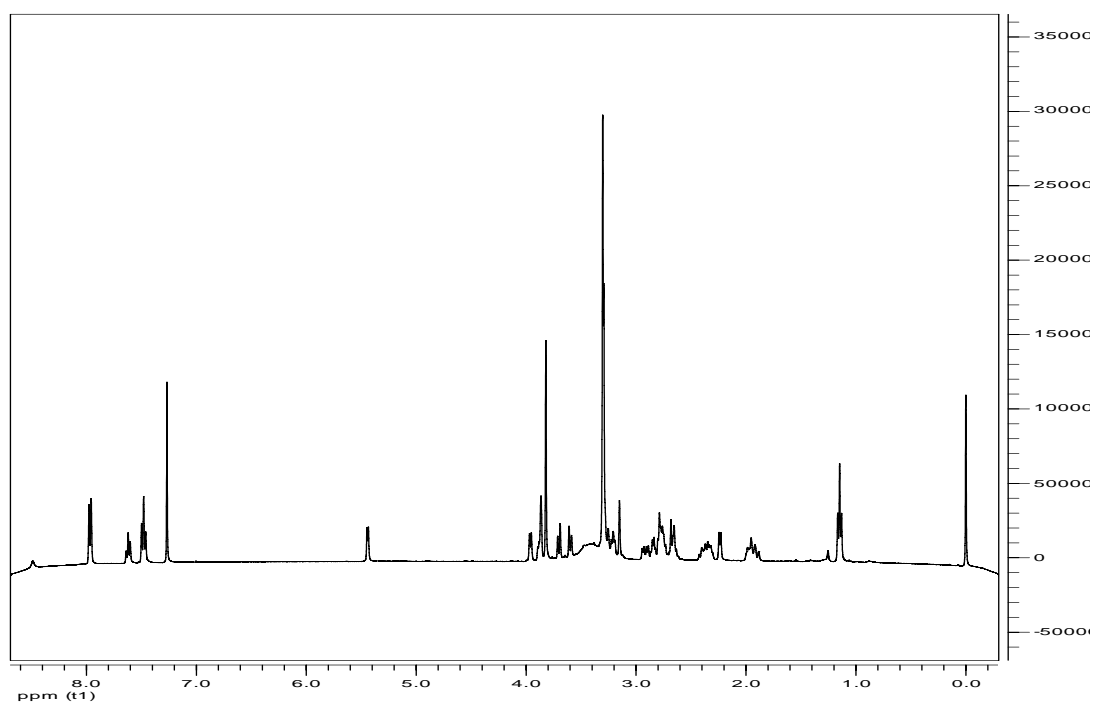

**S2:**  $^{13}\text{C}$ -NMR Spectrum of Compound 1 in  $\text{CDCl}_3$

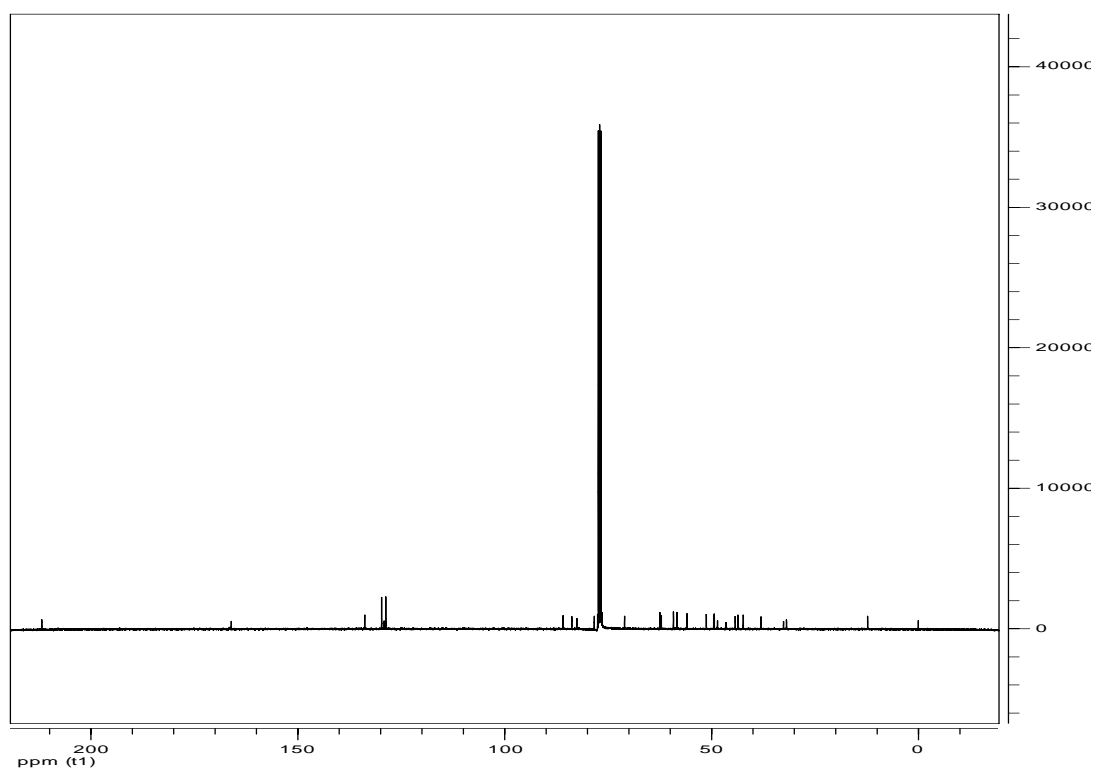

**S3:**  $^{13}\text{C}$  DEPT Spectrum of Compound 1 in  $\text{CDCl}_3$

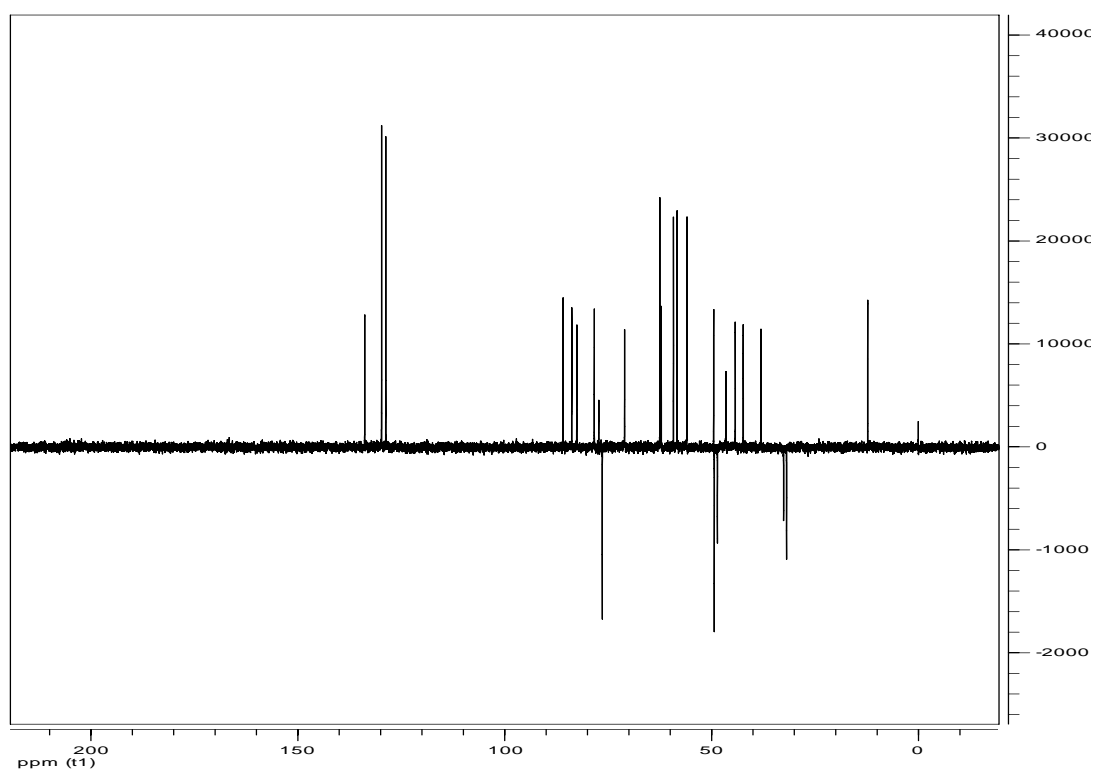

S4:  $g^1H$ - $^1H$ -HCOY Spectrum of Compound 1 in  $CDCl_3$

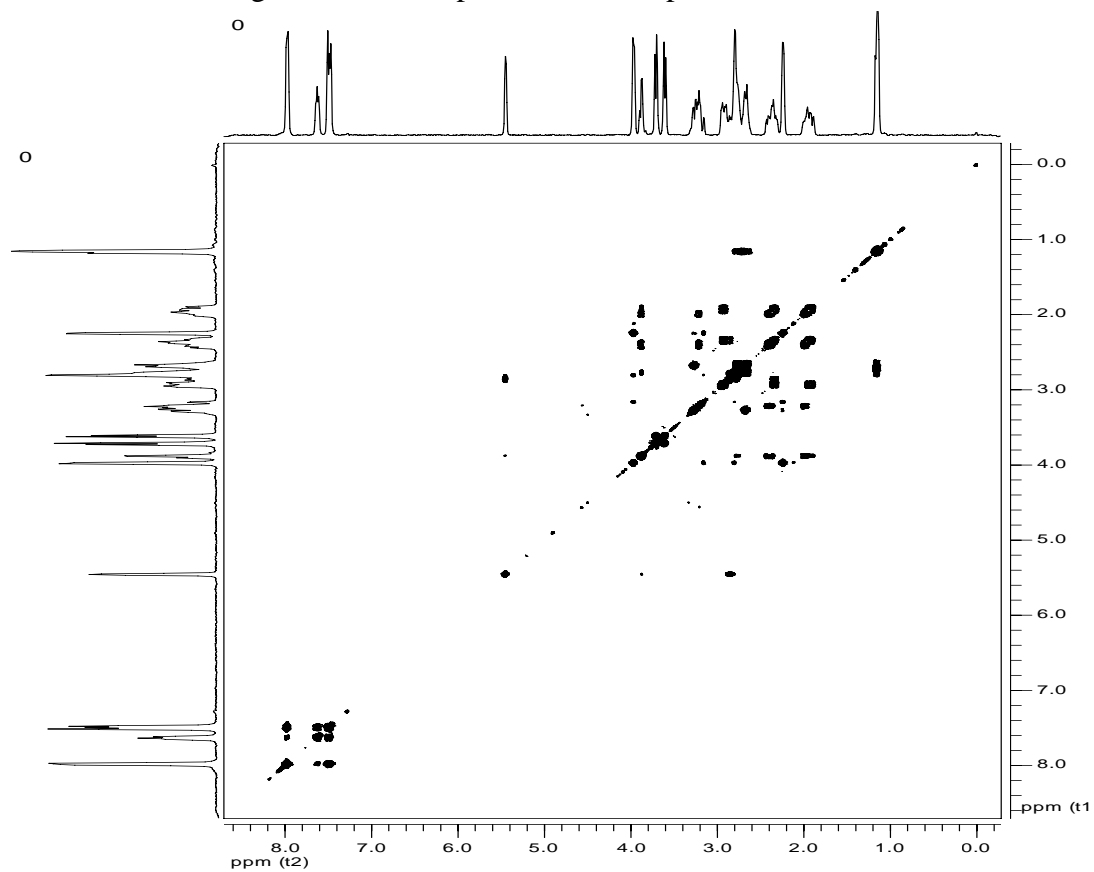

S5: gHSQC Spectrum of Compound 1 in  $CDCl_3$

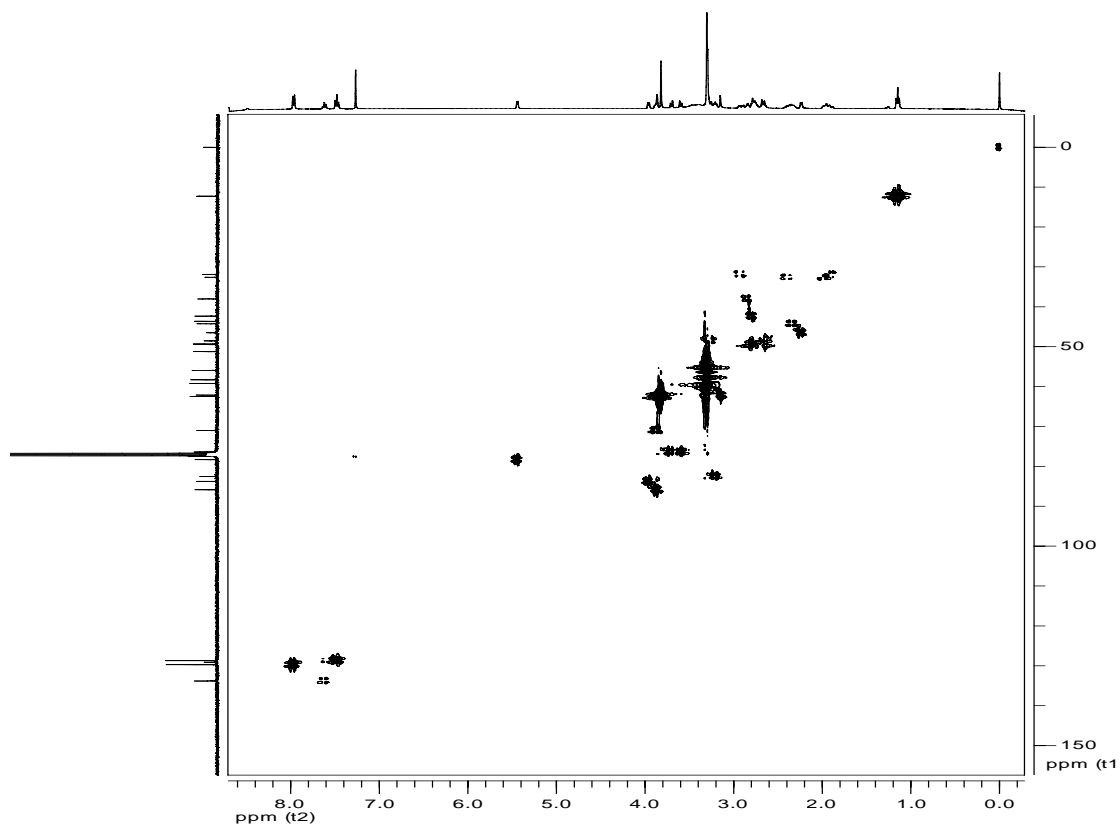

**S6:** gHMBC Spectrum of Compound 1 in CDCl<sub>3</sub>

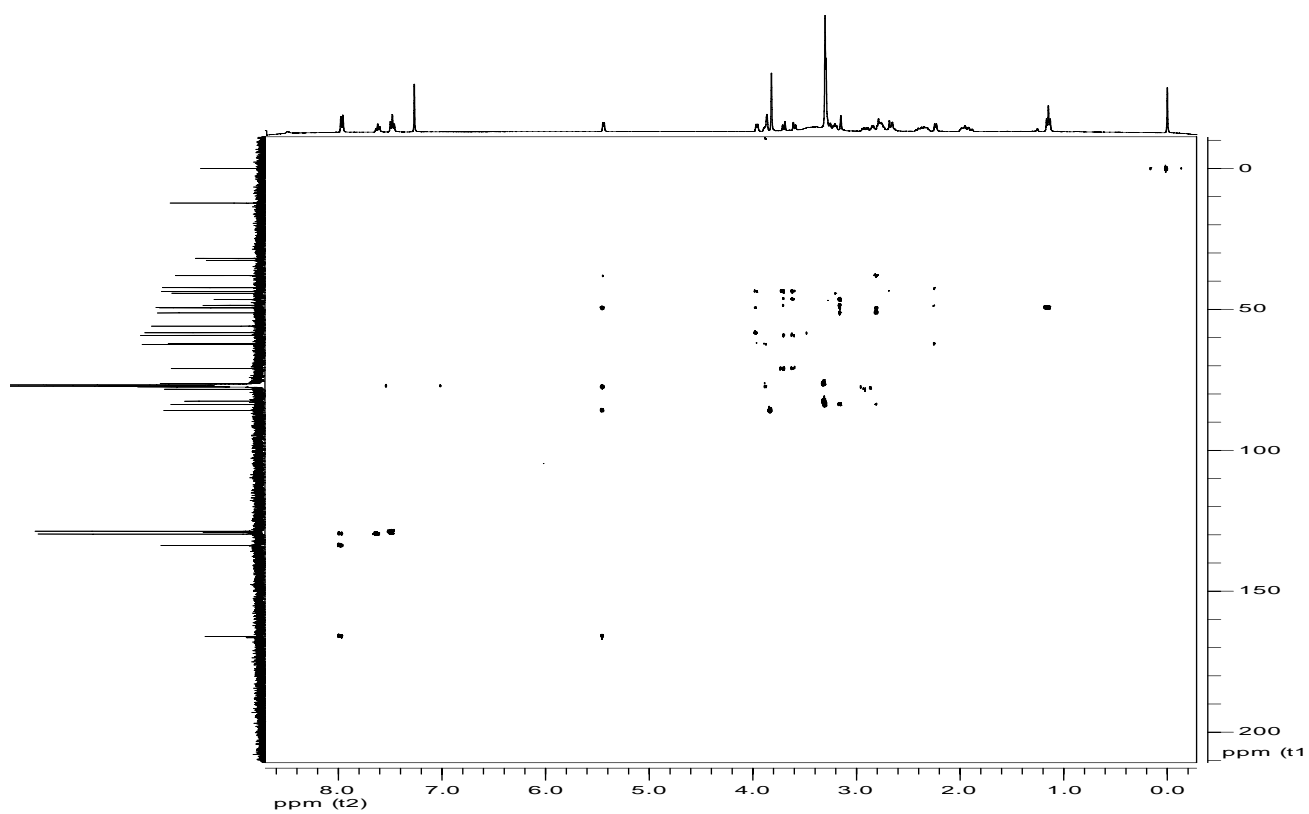

Supplement: Supplementary file 1 [file molecules-16-03345-s001.pdf]
